# Supplementary material
Source: MDPI journal article supplement (https://www.mdpi.com/2311-5637/9/5/438)
Supplement: s1 [file s1]

# Supplementary Materials

**Table S1.** Composition of medium.

| Media | Composition        |                   |                  |                  |                   |                     |                          | Water (mL) |
|-------|--------------------|-------------------|------------------|------------------|-------------------|---------------------|--------------------------|------------|
|       | Broken<br>rice (g) | Wheat<br>bran (g) | Rice<br>bran (g) | Corn<br>bran (g) | Rice<br>husks (g) | Coffee<br>husks (g) | Sugarcane<br>bagasse (g) |            |
| M1    | 25                 | 0                 | 0                | 0                | 0                 | 0                   | 0                        | 20         |
| M2    | 15                 | 7.5               | 0                | 0                | 2.5               | 0                   | 0                        | 20         |
| M3    | 15                 | 7.5               | 0                | 0                | 0                 | 2.5                 | 0                        | 20         |
| M4    | 15                 | 7.5               | 0                | 0                | 0                 | 0                   | 2.5                      | 20         |
| M5    | 15                 | 0                 | 7.5              | 0                | 2.5               | 0                   | 0                        | 20         |
| M6    | 15                 | 0                 | 7.5              | 0                | 0                 | 2.5                 | 0                        | 20         |
| M7    | 15                 | 0                 | 7.5              | 0                | 0                 | 0                   | 2.5                      | 20         |
| M8    | 15                 | 0                 | 0                | 7.5              | 2.5               | 0                   | 0                        | 20         |
| M9    | 15                 | 0                 | 0                | 7.5              | 0                 | 2.5                 | 0                        | 20         |
| M10   | 15                 | 0                 | 0                | 7.5              | 0                 | 0                   | 2.5                      | 20         |

**Table S2.** Location of sample collection and GenBank accession number of isolated *Penicillium citrinum*.

| <b>Isolate</b> | <b>Sample</b>   | <b>Location of sample collection</b>           | <b>GenBank accession number</b> |
|----------------|-----------------|------------------------------------------------|---------------------------------|
| P01            | Infected insect | Xuan Tho, Di Linh, Lam Dong, Vietnam           | OQ745802                        |
| P02            | Infected insect | Bao Thuan, Di Linh, Lam Dong, Vietnam          | OQ745803                        |
| P03            | Infected insect | Bao Thuan, Di Linh, Lam Dong, Vietnam          | OQ745804                        |
| P04            | Infected insect | Phuoc Thanh, Cu Chi, Ho Chi Minh City, Vietnam | OQ745805                        |
| P05            | Infected insect | Nghia Duc, Gia Nghia, Dak Nong, Vietnam        | OQ745806                        |
| P06            | Infected insect | Nghia Trung, Gia Nghia, Dak Nong, Vietnam      | OQ745807                        |
| P07            | Infected insect | Dak R'Moan, Gia Nghia, Dak Nong, Vietnam       | OQ745808                        |
| P08            | Infected insect | Long Dinh, Can Duoc, Long An, Vietnam          | OQ745809                        |
| P09            | Infected insect | Long Huu Dong, Can Duoc, Long An, Vietnam      | OQ745810                        |
| P10            | Infected insect | Tan Thanh, Can Duoc, Long An, Vietnam          | OQ745811                        |

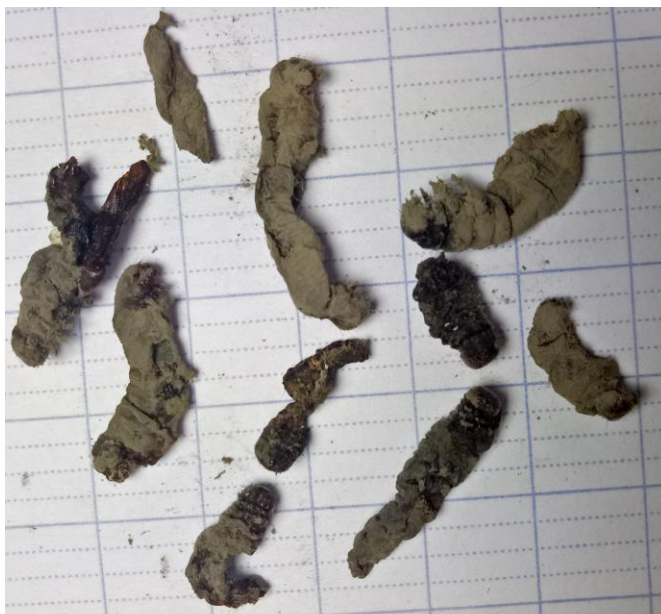

(A)

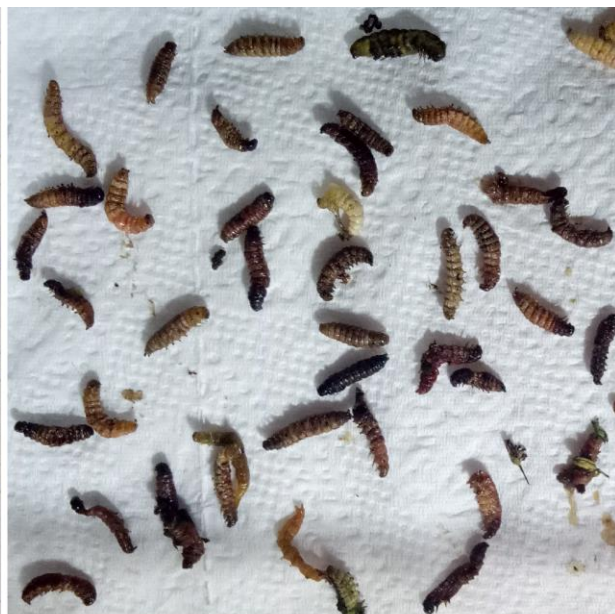

(B)

**Figure S1.** Dead *Spodoptera litura* (A) and *Plutella xylostella* (B) infected by isolated *Penicillium citrinum* in the pathogenicity test.
